# Supplementary material for: Oral Microbiota Linking Associations of Dietary Factors with Recurrent Oral Ulcer
Source: MDPI journal article supplement (doi:10.3390/nu16101519), 2024-05-17
Supplement: s1 [file s1]

## Supplementary Materials

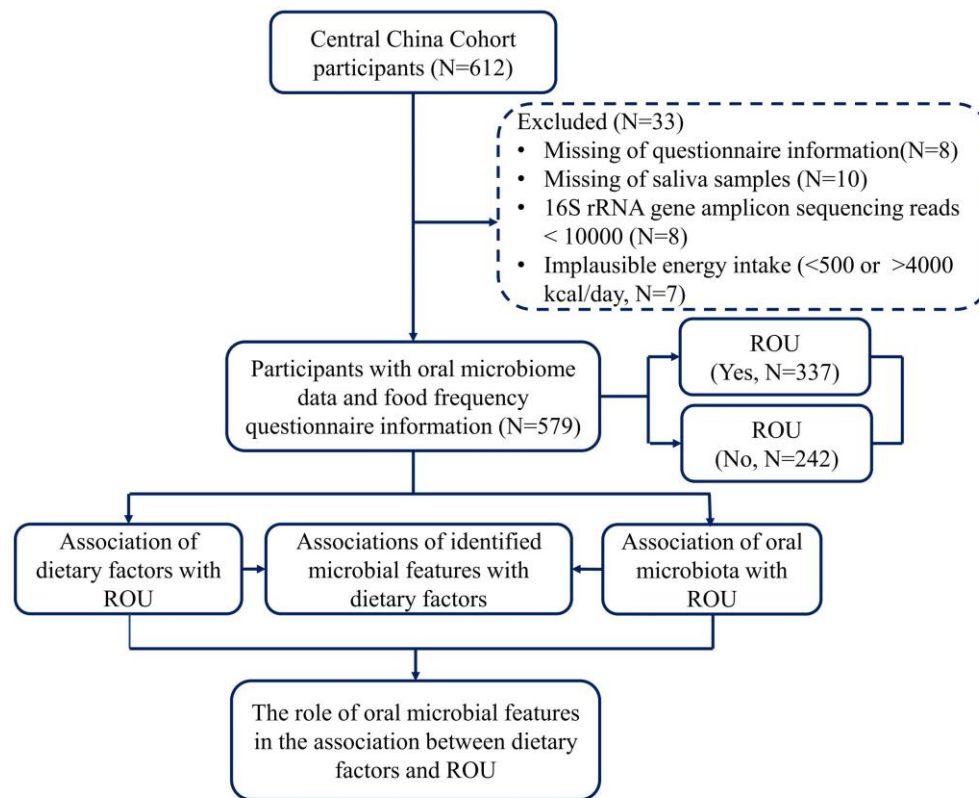

**Figure S1.** Flow-chart of study participants included in this study from Central China Cohort. *ROU* recurrent oral ulcer, *16S rRNA* 16S ribosomal RNA.

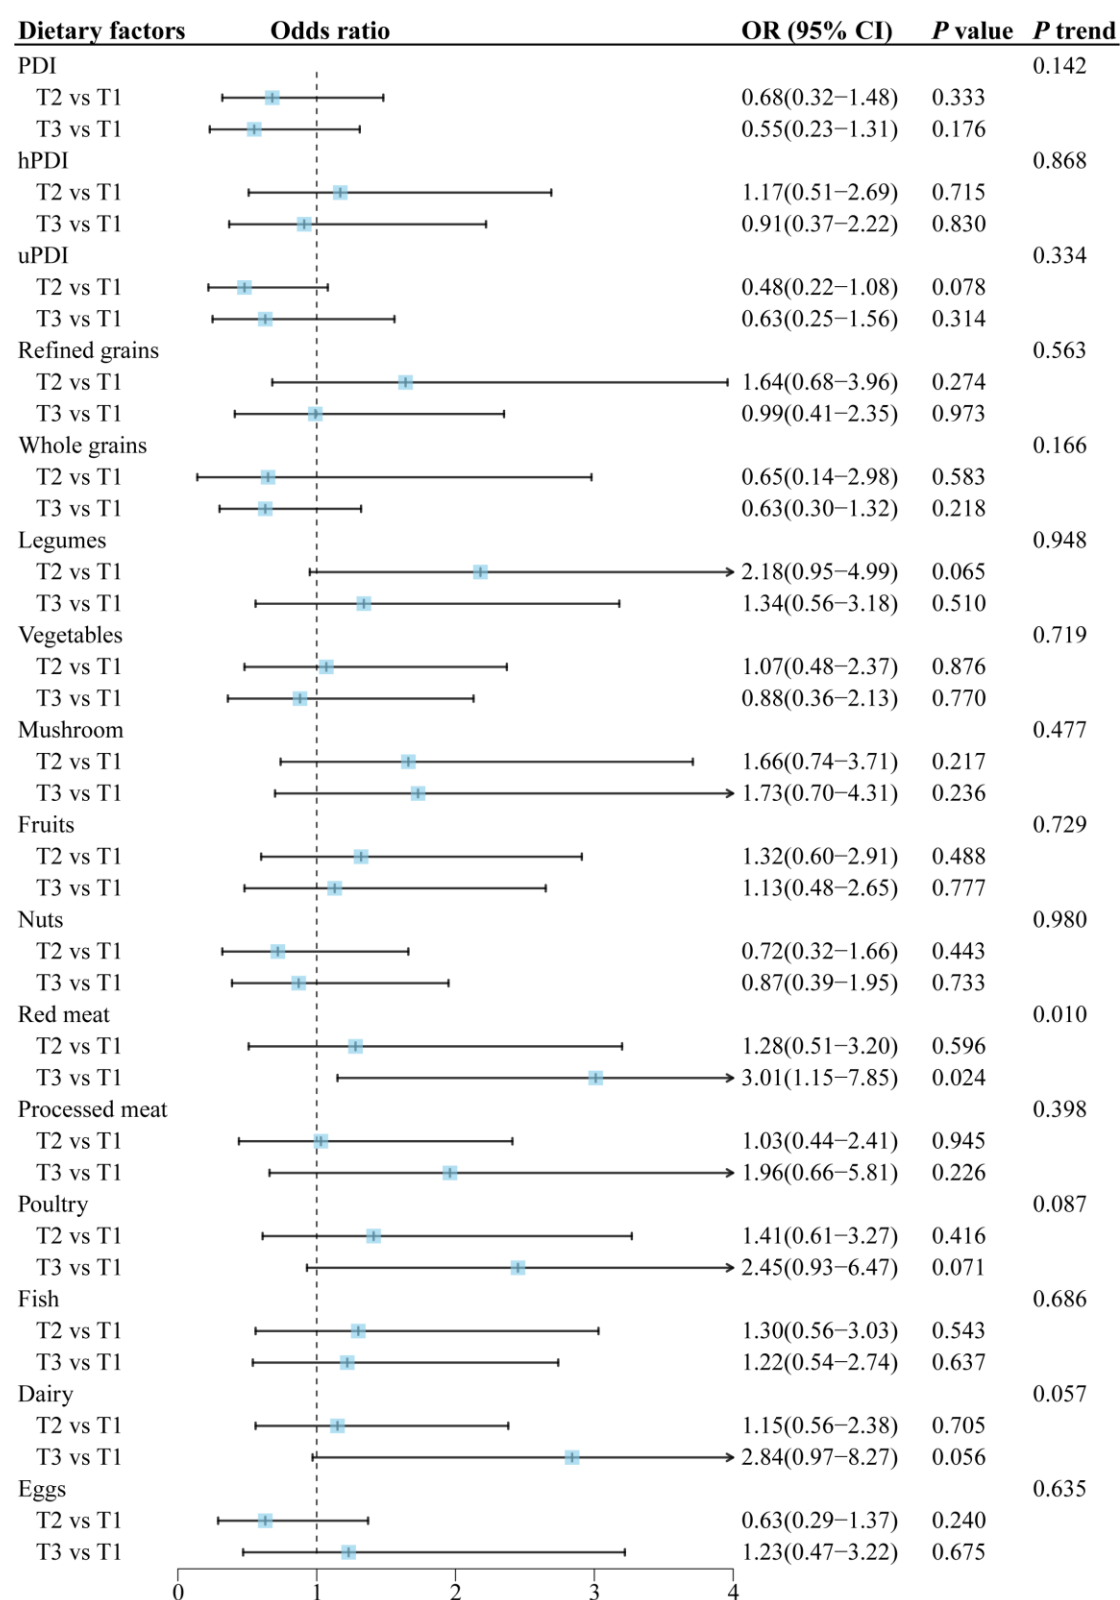

**Figure S2.** Associations of dietary factors with recurrent oral ulcer in males. Odds ratios were derived from logistic regression models for tertiles 2 (T2) and tertiles 3 (T3) of included dietary factors using tertiles 1 (T1) as the reference group. Covariates included age, current smoking status, physical activity, total energy intake, BMI, and common chronic diseases. *PDI* plant-based diet index, *hPDI* healthful plant-based diet index, *uPDI* unhealthful plant-based diet index.

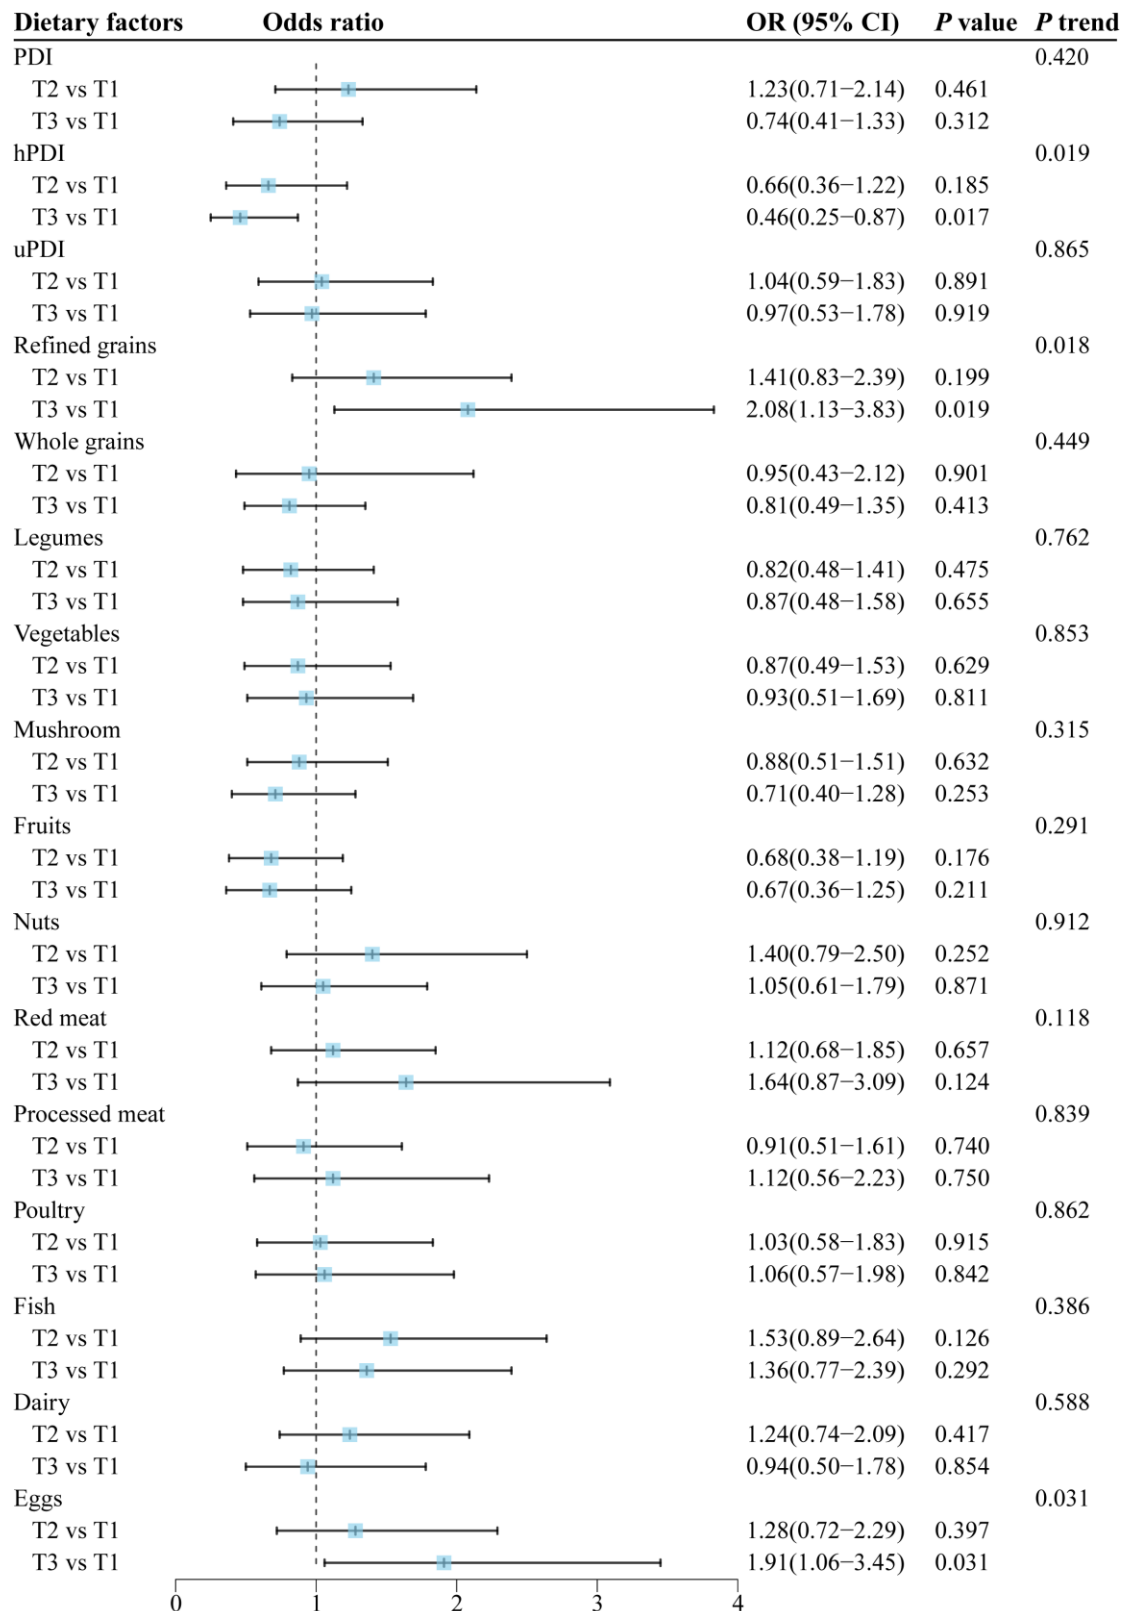

**Figure S3.** Associations of dietary factors with recurrent oral ulcer in females. Odds ratios were derived from logistic regression models for tertiles 2 (T2) and tertiles 3 (T3) of included dietary factors using tertiles 1 (T1) as the reference group. Covariates included age, current smoking status, physical activity, total energy intake, BMI, and common chronic diseases. *PDI* plant-based diet index, *hPDI* healthful plant-based diet index, *uPDI* unhealthful plant-based diet index.

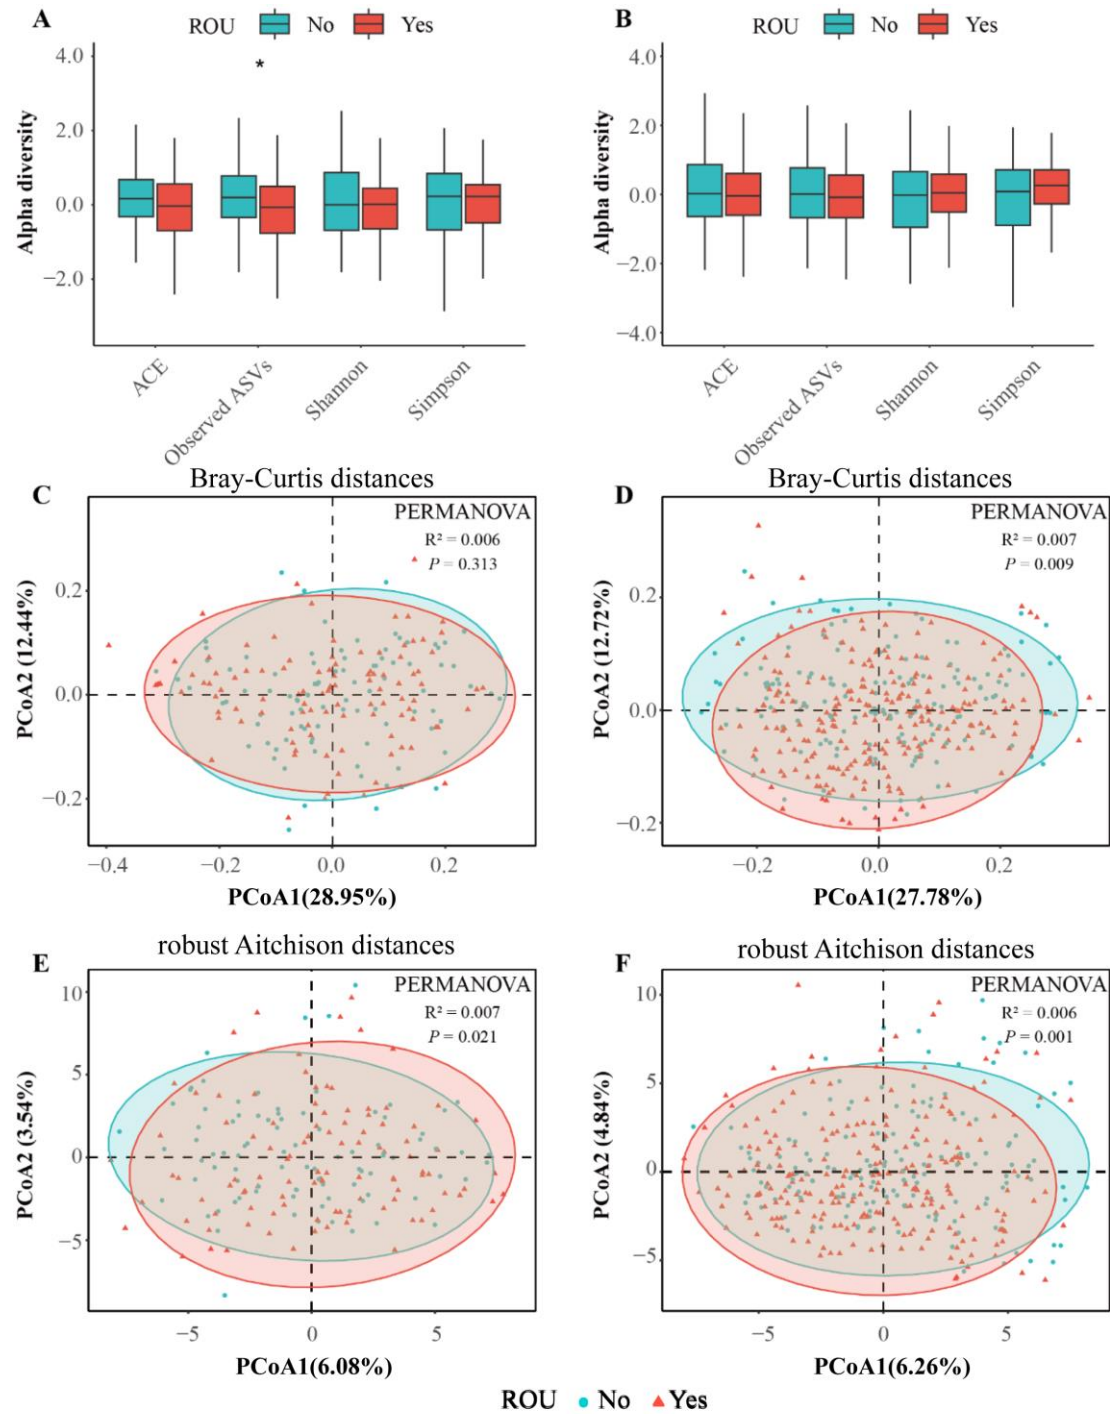

**Figure S4.** Diversity estimates and relative abundance of oral microbiota associated with ROU in males (A, C, E) and females (B, D, F). (A, B) Comparisons of ACE, Observed ASVs, Shannon and Simpson indices in the oral microbiota between participants with or without ROU in males (A) and females (B). \*  $p < 0.05$ . All four indices were z-score standardized for visualization. (C, D) PCoA based on the Bray-Curtis distances of the oral microbial communities between participants with or without ROU in males (C) and females (D). (E, F) PCoA based on the robust Aitchison distances of the oral microbial communities between participants with or without ROU in males (E) and females (F). ROU recurrent oral ulcer.

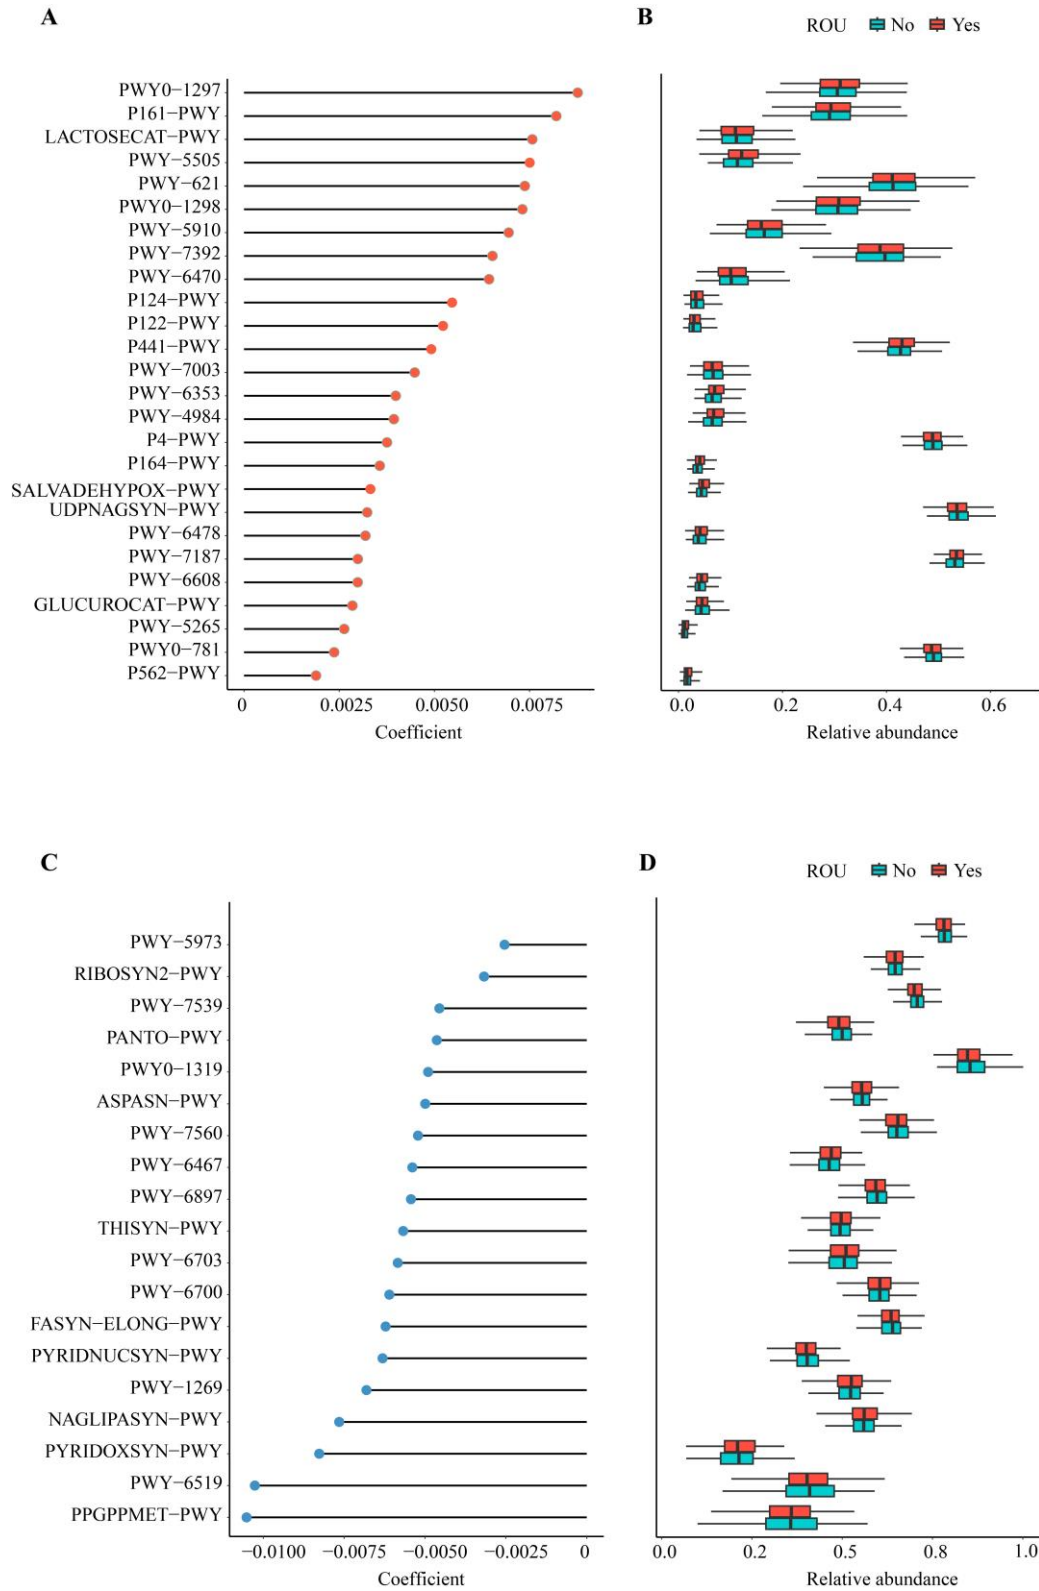

**Figure S5.** The relative abundance difference of ulcer-associated functional pathways. (A, C) The lollipop charts show the coefficients of pathways derived from MaAsLin analysis with  $p\text{-FDR} < 0.20$ . (B, D) The box plots show the relative abundances of differentially abundant pathways between participants with or without ROU. *ROU* recurrent oral ulcer.

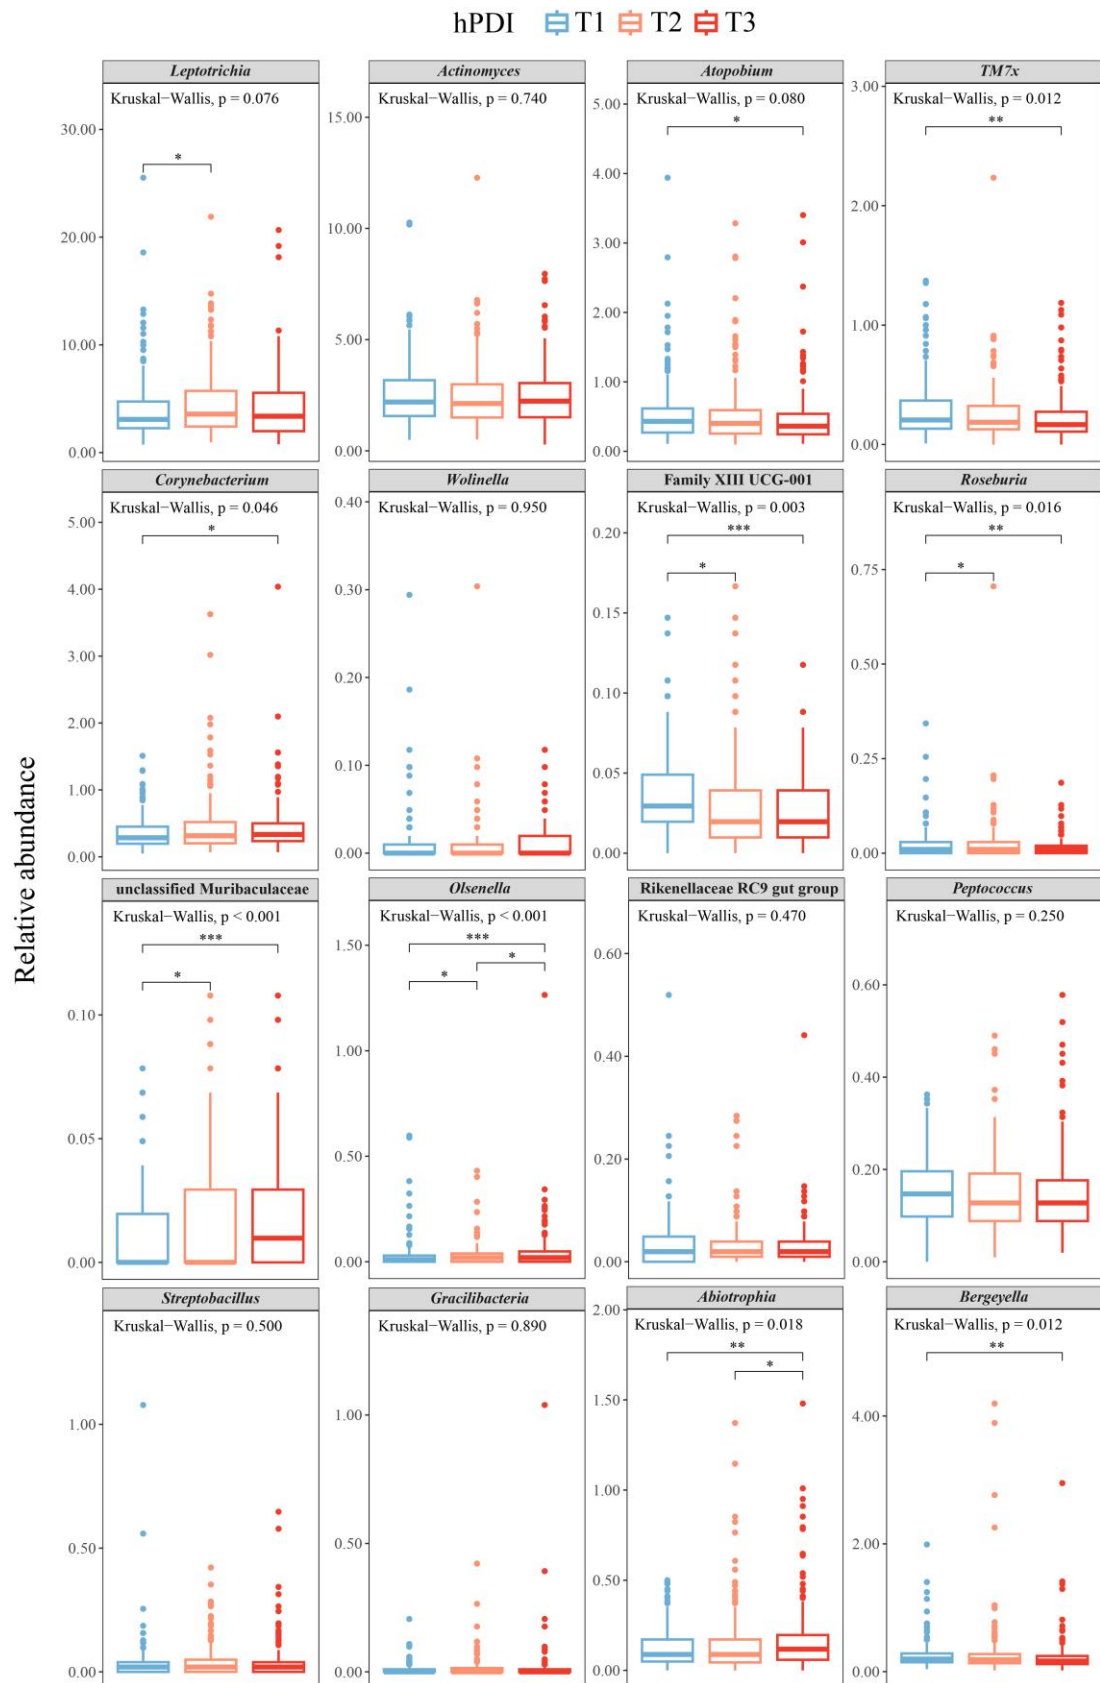

**Figure S6.** The relative abundance difference of 16 identified genera according to tertiles of healthful plant-based diet index. \*  $p < 0.05$ , \*\*  $p < 0.01$ , \*\*\*  $p < 0.001$ . hPDI healthful plant-based diet index.



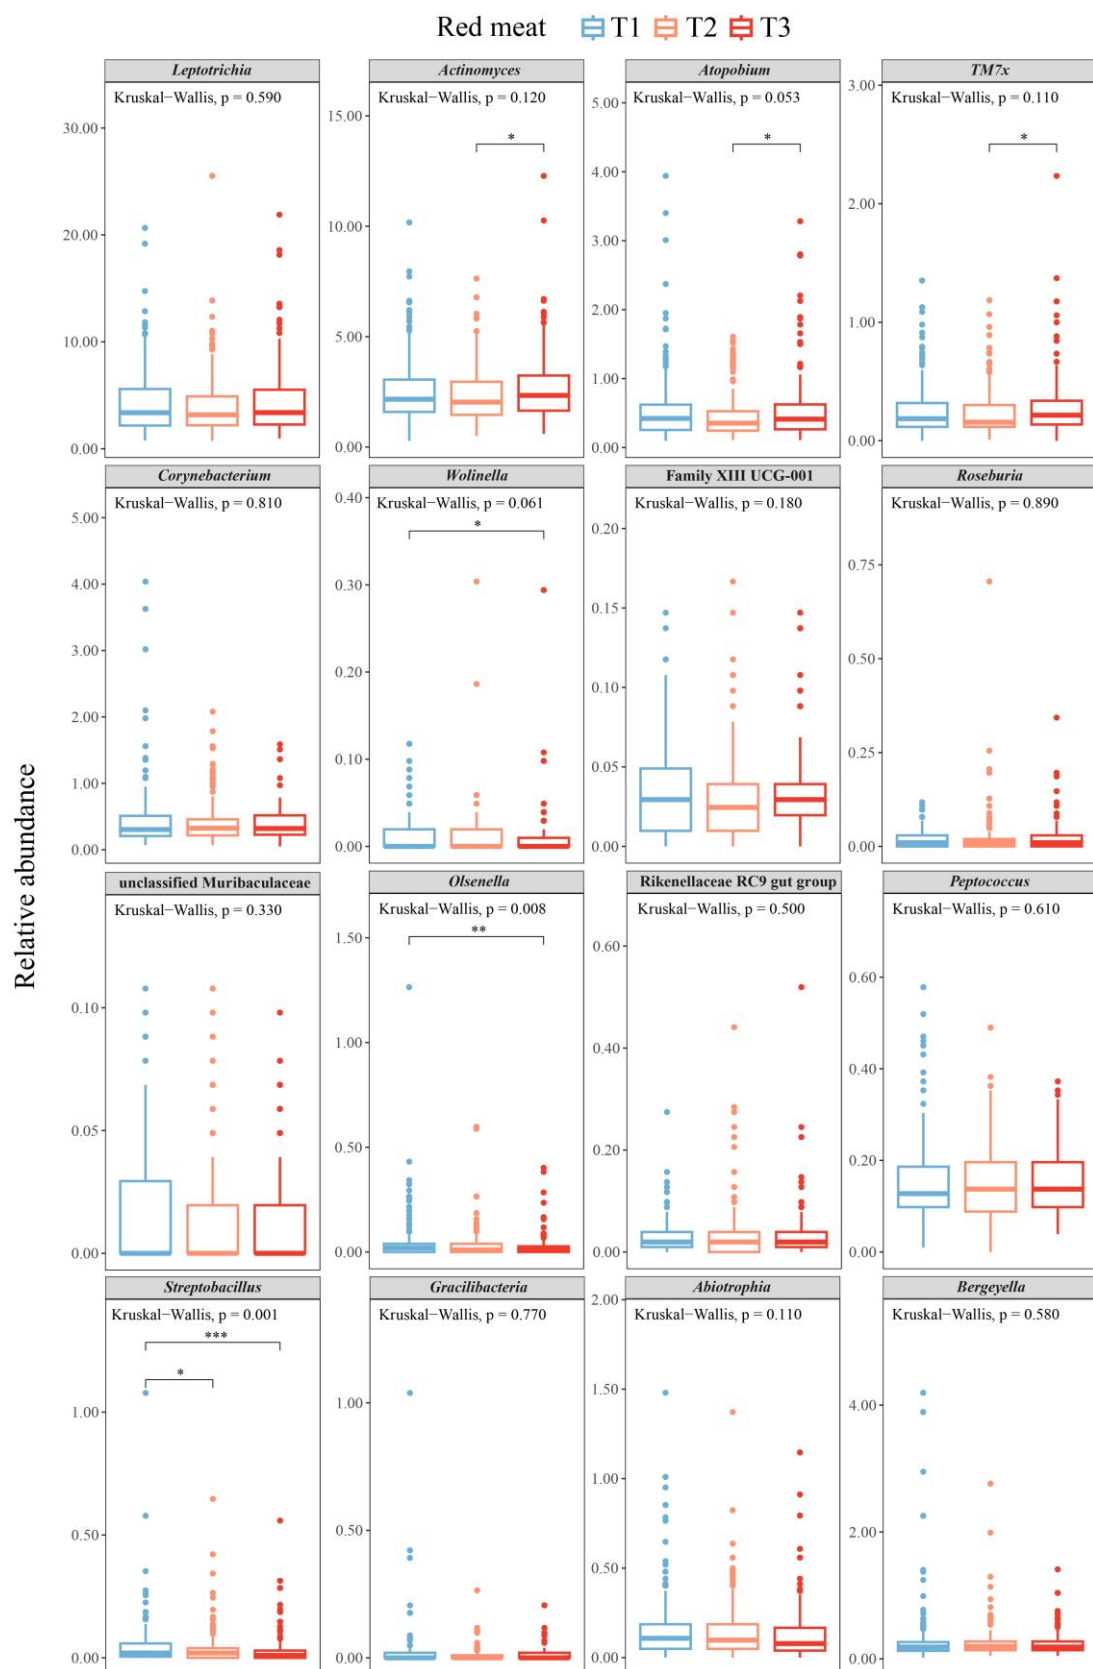

**Figure S7.** The relative abundance difference of 16 identified genera according to tertiles of red meat intake. \*  $p < 0.05$ , \*\*  $p < 0.01$ , \*\*\*  $p < 0.001$ .

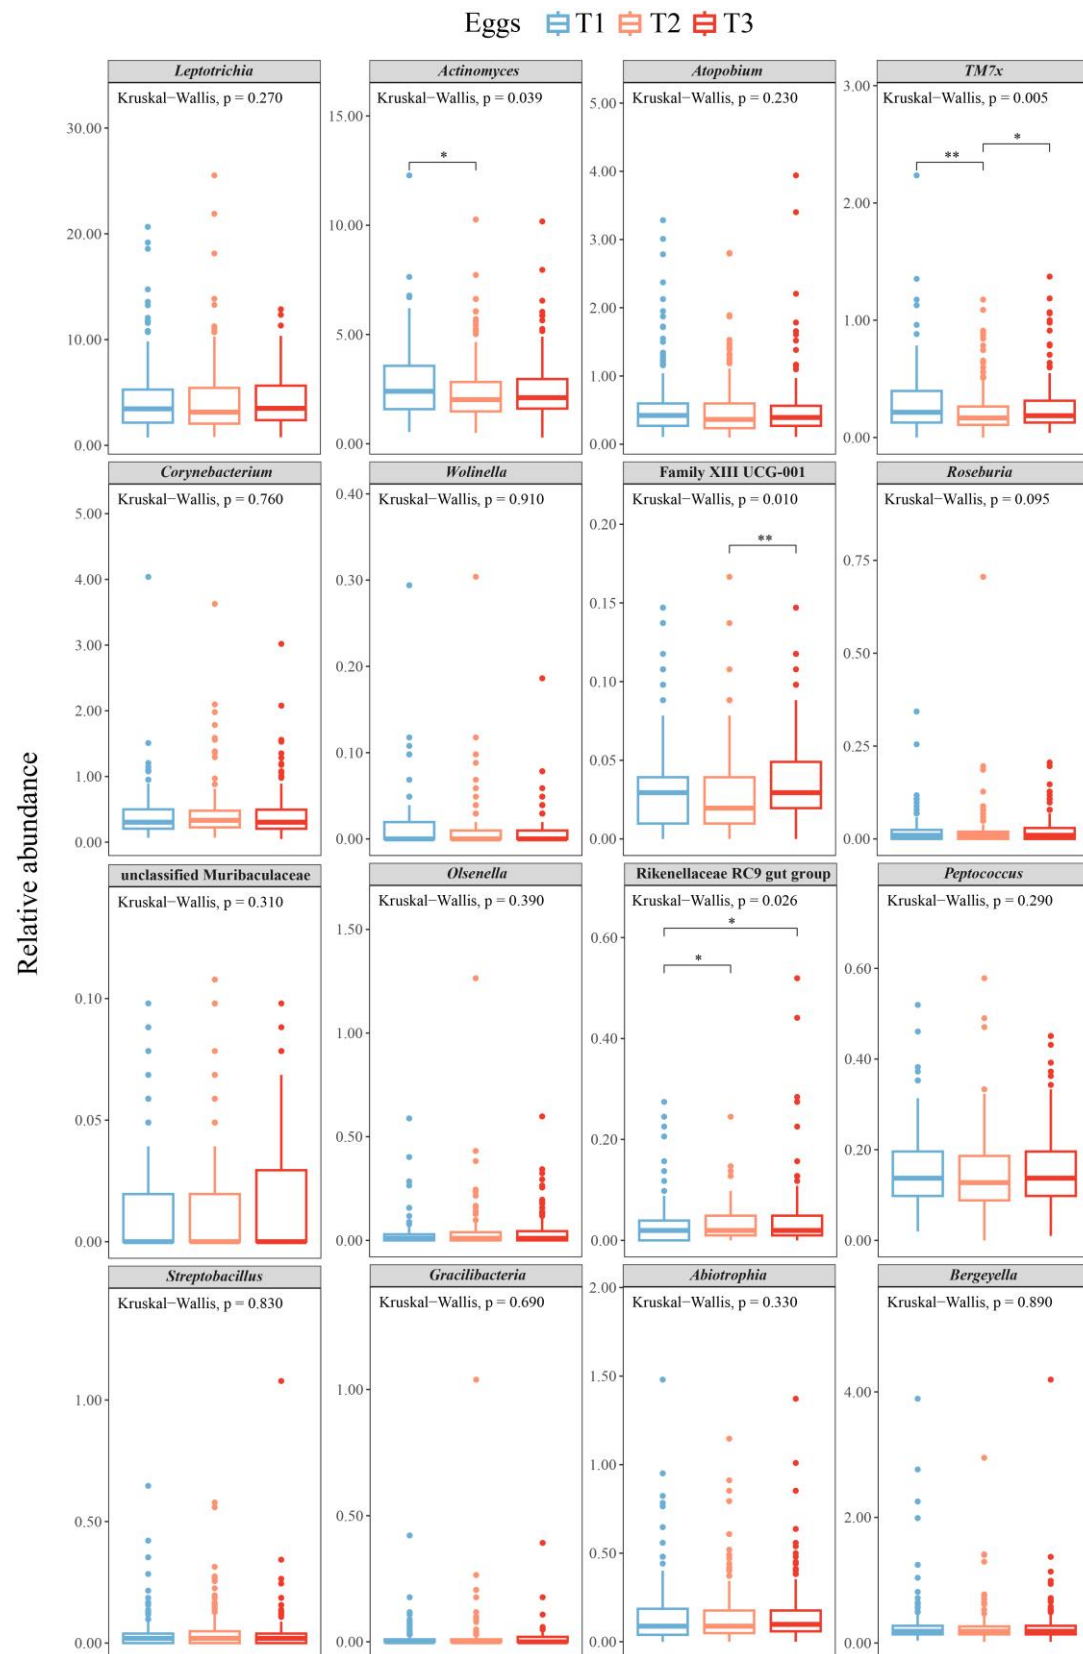

**Figure S8.** The relative abundance difference of 16 identified genera according to tertiles of egg intake. \*  $p < 0.05$ , \*\*  $p < 0.01$ .





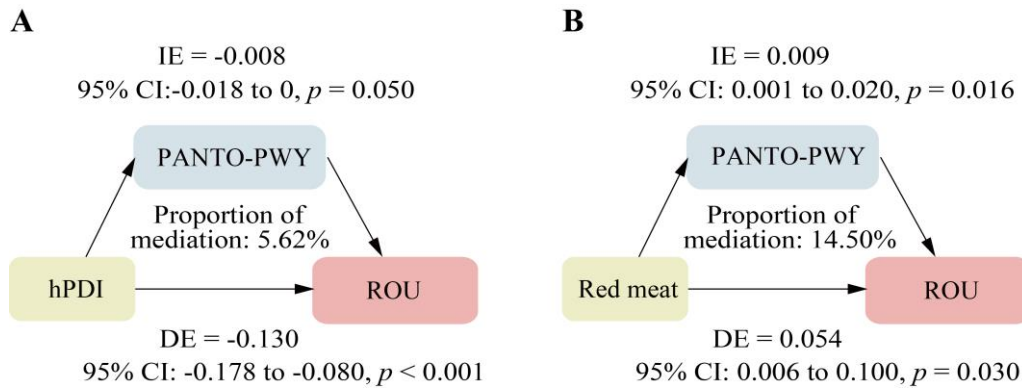

**Figure S10.** Associations mediation effect of functional pathways among the association between specific dietary factors and recurrent oral ulcer. The direct effect (DE) refers to the effect of dietary factors on ROU when pathways were held at a level. The indirect effect (IE) refers to the impact of dietary factors on ROU through pathways. Proportion of mediation represents the percentage of the association between dietary factors and ROU that is explained by pathways. *ROU* recurrent oral ulcer, *hPDI* healthful plant-based diet index, *IE* indirect effect, *DE* direct effect.

**Table S1.** Food groups, daily intakes and score assignments used to calculate plant-based diet indices\*.

| Food Group   | Food item(s)                                                                                                                                                                                                                                                                                   | Daily intake<br>(g/day) | Score assignment (18~90) |     |      |
|--------------|------------------------------------------------------------------------------------------------------------------------------------------------------------------------------------------------------------------------------------------------------------------------------------------------|-------------------------|--------------------------|-----|------|
|              |                                                                                                                                                                                                                                                                                                |                         | hPDI                     | PDI | uPDI |
| Whole grains | Coarse grains                                                                                                                                                                                                                                                                                  | <14.96                  | 1                        | 1   | 5    |
|              |                                                                                                                                                                                                                                                                                                | 14.96-49.08             | 2                        | 2   | 4    |
|              |                                                                                                                                                                                                                                                                                                | 49.08-70.77             | 3                        | 3   | 3    |
|              |                                                                                                                                                                                                                                                                                                | 70.77-102.04            | 4                        | 4   | 2    |
|              |                                                                                                                                                                                                                                                                                                | >102.04                 | 5                        | 5   | 1    |
| Fruits       | Oranges, pomelos, tangerines, apple, pear, peach, plum, loquat, jujube, apricot, strawberries, blueberries, grapes, watermelon, melon, and other fruits (pineapple, lychee, mango, banana, etc.)                                                                                               | <77.85                  | 1                        | 1   | 5    |
|              |                                                                                                                                                                                                                                                                                                | 77.85-145.82            | 2                        | 2   | 4    |
|              |                                                                                                                                                                                                                                                                                                | 145.82-219.64           | 3                        | 3   | 3    |
|              |                                                                                                                                                                                                                                                                                                | 219.64-294.19           | 4                        | 4   | 2    |
|              |                                                                                                                                                                                                                                                                                                | >294.19                 | 5                        | 5   | 1    |
| Vegetables   | Greens (spinach, cabbage, lettuce, etc.), cauliflower, broccoli, kale, carrots, tomatoes, squash, lotus root, yam, white radish, asparagus, eggplant, fresh green/red pepper, cucumber, white gourd, loofah, zucchini, bitter gourd, celery, cabbage moss, onion, scallion, garlic, leek, etc. | <246.07                 | 1                        | 1   | 5    |
|              |                                                                                                                                                                                                                                                                                                | 246.07-309.21           | 2                        | 2   | 4    |
|              |                                                                                                                                                                                                                                                                                                | 309.21-388.59           | 3                        | 3   | 3    |
|              |                                                                                                                                                                                                                                                                                                | 388.59-475.71           | 4                        | 4   | 2    |
|              |                                                                                                                                                                                                                                                                                                | >475.71                 | 5                        | 5   | 1    |
| Nuts         | Peanuts, sunflower seeds, chestnuts, walnuts, etc.                                                                                                                                                                                                                                             | <1.95                   | 1                        | 1   | 5    |
|              |                                                                                                                                                                                                                                                                                                | 1.95-3.12               | 2                        | 2   | 4    |
|              |                                                                                                                                                                                                                                                                                                | 3.12-4.47               | 3                        | 3   | 3    |

|                |                                                                                                                                                                                       |                                              |   |   |   |
|----------------|---------------------------------------------------------------------------------------------------------------------------------------------------------------------------------------|----------------------------------------------|---|---|---|
|                |                                                                                                                                                                                       | 4.47-12.96                                   | 4 | 4 | 2 |
|                |                                                                                                                                                                                       | >12.96                                       | 5 | 5 | 1 |
| Legumes        | Soybean milk, fresh tofu, dried bean curd and all kinds of bean products, soybeans, green beans, black beans, edamame, lentils, cowpeas, yellow bean sprouts, mung bean sprouts, etc. | <10.18                                       | 1 | 1 | 5 |
|                |                                                                                                                                                                                       | 10.18-16.47                                  | 2 | 2 | 4 |
|                |                                                                                                                                                                                       | 16.47-24.15                                  | 3 | 3 | 3 |
|                |                                                                                                                                                                                       | 24.15-42.46                                  | 4 | 4 | 2 |
|                |                                                                                                                                                                                       | >42.26                                       | 5 | 5 | 1 |
|                |                                                                                                                                                                                       | <0.98                                        | 1 | 1 | 5 |
| Vegetable oils | Soy bean oil, peanut oil, olive oil, and seed oil                                                                                                                                     | 0.98-1.02                                    | 2 | 2 | 4 |
|                |                                                                                                                                                                                       | 1.02-1.06                                    | 3 | 3 | 3 |
|                |                                                                                                                                                                                       | 1.06-3.38                                    | 4 | 4 | 2 |
|                |                                                                                                                                                                                       | >3.38                                        | 5 | 5 | 1 |
|                |                                                                                                                                                                                       | <0.71×10 <sup>-4</sup>                       | 1 | 1 | 5 |
| Tea and coffee | Green tea, black tea, oolong tea, flower tea, Pu-erh tea, and coffee                                                                                                                  | 0.71×10 <sup>-4</sup> -1.25×10 <sup>-4</sup> | 2 | 2 | 4 |
|                |                                                                                                                                                                                       | 1.25×10 <sup>-4</sup> -2.54×10 <sup>-4</sup> | 3 | 3 | 3 |
|                |                                                                                                                                                                                       | 2.54×10 <sup>-4</sup> -1.90×10 <sup>-3</sup> | 4 | 4 | 2 |
|                |                                                                                                                                                                                       | >1.90×10 <sup>-3</sup>                       | 5 | 5 | 1 |
|                |                                                                                                                                                                                       | <34.92                                       | 5 | 1 | 1 |
| Fruit juices   | 100% pure juice and other juices                                                                                                                                                      | 34.92-37.66                                  | 4 | 2 | 2 |
|                |                                                                                                                                                                                       | 37.66-41.10                                  | 3 | 3 | 3 |
|                |                                                                                                                                                                                       | 41.10-57.34                                  | 2 | 4 | 4 |
|                |                                                                                                                                                                                       | >57.34                                       | 1 | 5 | 5 |
|                |                                                                                                                                                                                       | <114.96                                      | 5 | 1 | 1 |
| Refined grains | Rice, noodles and steamed bread                                                                                                                                                       | 114.96-147.72                                | 4 | 2 | 2 |
|                |                                                                                                                                                                                       | 147.72-185.27                                | 3 | 3 | 3 |
|                |                                                                                                                                                                                       | 185.27-232.15                                | 2 | 4 | 4 |

|                           |                                       |               |   |   |   |
|---------------------------|---------------------------------------|---------------|---|---|---|
|                           |                                       | >232.15       | 1 | 5 | 5 |
|                           |                                       | <13.72        | 5 | 1 | 1 |
|                           |                                       | 13.72-43.44   | 4 | 2 | 2 |
| Potatoes                  | Potato, sweet potato, etc.            | 43.44-60.91   | 3 | 3 | 3 |
|                           |                                       | 60.91-76.33   | 2 | 4 | 4 |
|                           |                                       | >76.33        | 1 | 5 | 5 |
|                           |                                       | <46.51        | 5 | 1 | 1 |
|                           | Coke and other carbonated drinks,     | 46.51-49.38   | 4 | 2 | 2 |
| Sugar sweetened beverages | and artificial sweetener or low sugar | 49.38-54.03   | 3 | 3 | 3 |
|                           | drinks                                | 54.03-90.59   | 2 | 4 | 4 |
|                           |                                       | >90.59        | 1 | 5 | 5 |
|                           |                                       | <7.35         | 5 | 1 | 1 |
|                           |                                       | 7.35-7.94     | 4 | 2 | 2 |
| Sweets and desserts       | Pastries, biscuits, cakes, candy      | 7.94-8.69     | 3 | 3 | 3 |
|                           | preserves, ice cream, etc.            | 8.69-13.98    | 2 | 4 | 4 |
|                           |                                       | >13.98        | 1 | 5 | 5 |
|                           |                                       | <1.96         | 5 | 5 | 5 |
|                           |                                       | 1.96-2.02     | 4 | 4 | 4 |
| Animal fat                | Lard and butter                       | 2.02-2.09     | 3 | 3 | 3 |
|                           |                                       | 2.09-4.14     | 2 | 2 | 2 |
|                           |                                       | >4.14         | 1 | 1 | 1 |
|                           |                                       | <54.81        | 5 | 5 | 5 |
|                           | Whole fat milk, low fat milk,         | 54.81-82.74   | 4 | 4 | 4 |
| Dairy                     | powdered milk (whole fat),            | 82.74-181.88  | 3 | 3 | 3 |
|                           | powdered milk (low fat), yogurt,      | 181.88-318.05 | 2 | 2 | 2 |
|                           | and cheese                            | >318.05       | 1 | 1 | 1 |
|                           |                                       | <42.23        | 5 | 5 | 5 |
| Eggs                      | Fresh egg, duck egg, etc.             | 42.23-55.37   | 4 | 4 | 4 |

|                                 |                                                                                                                                                                                                             |             |   |   |   |
|---------------------------------|-------------------------------------------------------------------------------------------------------------------------------------------------------------------------------------------------------------|-------------|---|---|---|
|                                 |                                                                                                                                                                                                             | 55.37-64.97 | 3 | 3 | 3 |
|                                 |                                                                                                                                                                                                             | 64.97-76.96 | 2 | 2 | 2 |
|                                 |                                                                                                                                                                                                             | >76.96      | 1 | 1 | 1 |
| Fish or seafood                 | Fresh water fish (silver carp, bream, crucian carp, etc.), salt water fish (yellow croaker, hair tail, etc.), shrimp or crab, conch, rice field eel or river eel, salted fish or processed fishery products | <12.03      | 5 | 5 | 5 |
|                                 |                                                                                                                                                                                                             | 12.03-13.89 | 4 | 4 | 4 |
|                                 |                                                                                                                                                                                                             | 13.89-16.73 | 3 | 3 | 3 |
|                                 |                                                                                                                                                                                                             | 16.73-22.57 | 2 | 2 | 2 |
|                                 |                                                                                                                                                                                                             | >22.57      | 1 | 1 | 1 |
|                                 |                                                                                                                                                                                                             |             |   |   |   |
| Meat                            | Fresh pork, fresh beef or lamb, poultry (chicken, duck, goose, etc.), animal livers, organ meat (heart, brain, tongue, tripe, intestine, etc.), and processed meat (sausage, spam, etc.)                    | <18.74      | 5 | 5 | 5 |
|                                 |                                                                                                                                                                                                             | 18.74-27.03 | 4 | 4 | 4 |
|                                 |                                                                                                                                                                                                             | 27.03-42.49 | 3 | 3 | 3 |
|                                 |                                                                                                                                                                                                             | 42.49-65.69 | 2 | 2 | 2 |
|                                 |                                                                                                                                                                                                             | >65.69      | 1 | 1 | 1 |
|                                 |                                                                                                                                                                                                             |             |   |   |   |
| Micellaneous animal based foods | Meat bun and meat pie                                                                                                                                                                                       | <7.52       | 5 | 5 | 5 |
|                                 |                                                                                                                                                                                                             | 7.52-10.94  | 4 | 4 | 4 |
|                                 |                                                                                                                                                                                                             | 10.94-15.46 | 3 | 3 | 3 |
|                                 |                                                                                                                                                                                                             | 15.46-36.24 | 2 | 2 | 2 |
|                                 |                                                                                                                                                                                                             | >36.24      | 1 | 1 | 1 |

\* Eighteen food groups were assigned either positive or reverse scores after segregation into quintiles. Participants with an intake above the highest quintile for the positive score received a score of 5. Those below the lowest quintile intake received a score of 1. A reverse value was applied for the reverse scores. The scores for each participant were summed to create the final score.



**Table S2.** The intakes of food groups based on the presence of recurrent oral ulcer.

| Food groups            | Recurrent oral ulcer |                 | <i>p</i> -Value |
|------------------------|----------------------|-----------------|-----------------|
|                        | Yes (N=337)          | No (N=242)      |                 |
| Refined grains (g/day) | 183.75 (93.83)       | 183.53 (104.45) | 0.564           |
| Whole grains (g/day)   | 58.31 (53.28)        | 64.89 (45.89)   | 0.008           |
| Legumes (g/day)        | 18.82 (17.48)        | 18.61 (13.69)   | 0.368           |
| Vegetables (g/day)     | 368.63 (212.51)      | 368.48 (129.43) | 0.167           |
| Mushroom (g/day)       | 27.18 (31.65)        | 26.98 (36.08)   | 0.677           |
| Fruits (g/day)         | 193.61 (135.79)      | 190.52 (136.91) | 0.642           |
| Nuts (g/day)           | 6.61 (7.07)          | 7.27 (7.50)     | 0.439           |
| Red meat (g/day)       | 24.41 (25.80)        | 20.83 (21.14)   | 0.023           |
| Processed meat (g/day) | 7.65 (10.28)         | 6.19 (9.81)     | <0.001          |
| Poultry (g/day)        | 11.33 (14.03)        | 10.00 (17.99)   | 0.013           |
| Fish (g/day)           | 19.48 (26.63)        | 15.24 (9.76)    | 0.006           |
| Dairy (g/day)          | 249.47 (205.12)      | 244.62 (287.62) | <0.001          |
| Eggs (g/day)           | 63.96 (34.55)        | 60.79 (32.81)   | 0.205           |

Data are presented as median (interquartile ranges). *p*-Values were based on Wilcoxon rank sum test.

**Table S3.** Daily intake ranges for tertiles of 13 food groups.

| Food groups            | T1      | T2            | T3      |
|------------------------|---------|---------------|---------|
| Refined grains (g/day) | <122.86 | 122.86-202.00 | >202.00 |
| Whole grains (g/day)   | <57.14  | 57.14-85.71   | >85.71  |
| Legumes (g/day)        | <10.48  | 10.48-19.34   | >19.34  |
| Vegetables (g/day)     | <296.47 | 296.47-414.28 | >414.28 |
| Mushroom (g/day)       | <10.00  | 10.00-33.57   | >33.57  |
| Fruits (g/day)         | <105.59 | 105.59-240.22 | >240.22 |
| Nuts (g/day)           | <2.50   | 2.50-3.57     | >3.57   |
| Red meat (g/day)       | <8.81   | 8.81-30.24    | >30.24  |
| Processed meat (g/day) | <3.33   | 3.33-6.67     | >6.67   |
| Poultry (g/day)        | <5.00   | 5.00-7.14     | >7.14   |
| Fish (g/day)           | <9.67   | 9.67-15.67    | >15.67  |
| Dairy (g/day)          | <138.99 | 138.99-253.13 | >253.13 |
| Eggs (g/day)           | <52.32  | 52.32-67.65   | >67.65  |

Thirteen food groups were divided by tertiles of daily intakes.

**Table S4.** The distribution of recurrent oral ulcer among tertile groups of all dietary factors.

| Dietary factors | Recurrent oral ulcer |             | <i>p</i> -Value |
|-----------------|----------------------|-------------|-----------------|
|                 | Yes (N=337)          | No(N=242)   |                 |
| PDI             |                      |             | 0.187           |
| T1              | 133 (39.5%)          | 81 (33.5%)  |                 |
| T2              | 118 (35.0%)          | 84 (34.7%)  |                 |
| T3              | 86 (25.5%)           | 77 (31.8%)  |                 |
| hPDI            |                      |             | <0.001          |
| T1              | 138 (40.9%)          | 53 (21.9%)  |                 |
| T2              | 120 (35.6%)          | 91 (37.6%)  |                 |
| T3              | 79 (23.4%)           | 98 (40.5%)  |                 |
| uPDI            |                      |             | 0.840           |
| T1              | 113 (33.5%)          | 80 (33.1%)  |                 |
| T2              | 115 (34.1%)          | 88 (36.4%)  |                 |
| T3              | 109 (32.3%)          | 74 (30.6%)  |                 |
| Refined grains  |                      |             | 0.435           |
| T1              | 118 (35.0%)          | 96 (39.7%)  |                 |
| T2              | 115 (34.1%)          | 72 (29.8%)  |                 |
| T3              | 104 (30.9%)          | 74 (30.6%)  |                 |
| Whole grains    |                      |             | 0.006           |
| T1              | 222 (65.9%)          | 131 (54.1%) |                 |
| T2              | 27 (8.0%)            | 18 (7.4%)   |                 |
| T3              | 88 (26.1%)           | 93 (38.4%)  |                 |
| Legumes         |                      |             | 0.707           |
| T1              | 115 (34.1%)          | 76 (31.4%)  |                 |
| T2              | 115 (34.1%)          | 82 (33.9%)  |                 |
| T3              | 107 (31.8%)          | 84 (34.7%)  |                 |
| Vegetables      |                      |             | 0.283           |
| T1              | 120 (35.6%)          | 71 (29.3%)  |                 |
| T2              | 112 (33.2%)          | 87 (36.0%)  |                 |
| T3              | 105 (31.2%)          | 84 (34.7%)  |                 |
| Mushroom        |                      |             | 0.785           |
| T1              | 131 (38.9%)          | 101 (41.7%) |                 |
| T2              | 109 (32.3%)          | 75 (31.0%)  |                 |
| T3              | 97 (28.8%)           | 66 (27.3%)  |                 |
| Fruits          |                      |             | 0.926           |
| T1              | 109 (32.3%)          | 82 (33.9%)  |                 |
| T2              | 116 (34.4%)          | 81 (33.5%)  |                 |
| T3              | 112 (33.2%)          | 79 (32.6%)  |                 |
| Nuts            |                      |             | 0.509           |
| T1              | 156 (46.3%)          | 109 (45.0%) |                 |
| T2              | 85 (25.2%)           | 54 (22.3%)  |                 |
| T3              | 96 (28.5%)           | 79 (32.6%)  |                 |
| Red meat        |                      |             | 0.047           |
| T1              | 112 (33.2%)          | 99 (40.9%)  |                 |
| T2              | 116 (34.4%)          | 86 (35.5%)  |                 |
| T3              | 109 (32.3%)          | 57 (23.6%)  |                 |
| Processed meat  |                      |             | 0.001           |
| T1              | 180 (53.4%)          | 162 (66.9%) |                 |

|         |             |             |        |
|---------|-------------|-------------|--------|
| T2      | 85 (25.2%)  | 53 (21.9%)  | 0.127  |
| T3      | 72 (21.4%)  | 27 (11.2%)  |        |
| Poultry |             |             |        |
| T1      | 180 (53.4%) | 149 (61.6%) | 0.029  |
| T2      | 82 (24.3%)  | 52 (21.5%)  |        |
| T3      | 75 (22.3%)  | 41 (16.9%)  |        |
| Fish    |             |             | <0.001 |
| T1      | 117 (34.7%) | 108 (44.6%) |        |
| T2      | 98 (29.1%)  | 68 (28.1%)  |        |
| T3      | 122 (36.2%) | 66 (27.3%)  | 0.105  |
| Dairy   |             |             |        |
| T1      | 104 (30.9%) | 111 (45.9%) |        |
| T2      | 138 (40.9%) | 89 (36.8%)  | 0.105  |
| T3      | 95 (28.2%)  | 42 (17.4%)  |        |
| Eggs    |             |             |        |
| T1      | 110 (32.6%) | 81 (33.5%)  |        |
| T2      | 105 (31.2%) | 92 (38.0%)  |        |
| T3      | 122 (36.2%) | 69 (28.5%)  |        |

Data are presented as n (percentage) for categorical variables. The percentage sum of some cells is not equal to 100 because the percentage was rounded to retain decimal places. *p*-Values were based on Chi-squared test. *PDI* plant-based diet index, *hPDI* healthful plant-based diet index, *uPDI* unhealthy plant-based diet index.

**Table S5.** Distributions of chronic systemic diseases of study participants

| Diseases                        | n  | Prevalence |
|---------------------------------|----|------------|
| Hypertension                    | 51 | 8.81%      |
| Cardiovascular diseases         | 50 | 8.64%      |
| Diabetes                        | 19 | 3.28%      |
| Tumor                           | 13 | 2.25%      |
| Gastritis                       | 12 | 2.07%      |
| Osteoarthritis                  | 11 | 1.90%      |
| Hepatitis                       | 11 | 1.90%      |
| Gastroenteritis                 | 11 | 1.90%      |
| Otorhinolaryngological diseases | 10 | 1.73%      |
| Endocrine system diseases       | 8  | 1.38%      |
| Nervous system diseases         | 8  | 1.38%      |
| Lumbar disc herniation          | 7  | 1.21%      |
| Gynecological diseases          | 5  | 0.86%      |
| Hematologic diseases            | 5  | 0.86%      |
| Rheumatoid arthritis            | 5  | 0.86%      |
| Eye diseases                    | 4  | 0.69%      |
| Respiratory diseases            | 4  | 0.69%      |
| Cancer                          | 4  | 0.69%      |
| Kidney diseases                 | 3  | 0.52%      |
| Skin diseases                   | 2  | 0.35%      |
| Others                          | 3  | 0.52%      |

The number of the participants who have a certain chronic systemic disease and the prevalence of this condition has been quantified.

**Table S6.** Associations of dietary factors with recurrent oral ulcer.

| <b>Dietary factors</b> | <b>Odds ratio</b> | <b>95% CI</b> | <b><i>p</i>-Value</b> | <b><i>p</i> for trend</b> |
|------------------------|-------------------|---------------|-----------------------|---------------------------|
| PDI                    |                   |               |                       | 0.140                     |
| T2 vs T1               | 0.99              | 0.64-1.54     | 0.982                 |                           |
| T3 vs T1               | 0.68              | 0.42-1.11     | 0.122                 |                           |
| hPDI                   |                   |               |                       | 0.043                     |
| T2 vs T1               | 0.82              | 0.51-1.32     | 0.404                 |                           |
| T3 vs T1               | 0.55              | 0.33-0.92     | 0.022                 |                           |
| uPDI                   |                   |               |                       | 0.477                     |
| T2 vs T1               | 0.86              | 0.55-1.34     | 0.504                 |                           |
| T3 vs T1               | 0.85              | 0.52-1.39     | 0.523                 |                           |
| Refined grains         |                   |               |                       | 0.127                     |
| T2 vs T1               | 1.51              | 0.97-2.35     | 0.070                 |                           |
| T3 vs T1               | 1.53              | 0.94-2.48     | 0.085                 |                           |
| Whole grains           |                   |               |                       | 0.208                     |
| T2 vs T1               | 0.99              | 0.50-1.98     | 0.982                 |                           |
| T3 vs T1               | 0.75              | 0.50-1.13     | 0.172                 |                           |
| Legumes                |                   |               |                       | 0.821                     |
| T2 vs T1               | 1.07              | 0.69-1.67     | 0.762                 |                           |
| T3 vs T1               | 0.97              | 0.60-1.55     | 0.886                 |                           |
| Vegetables             |                   |               |                       | 0.779                     |
| T2 vs T1               | 0.94              | 0.60-1.48     | 0.795                 |                           |
| T3 vs T1               | 0.91              | 0.56-1.48     | 0.711                 |                           |
| Mushroom               |                   |               |                       | 0.667                     |
| T2 vs T1               | 1.04              | 0.67-1.61     | 0.864                 |                           |
| T3 vs T1               | 0.93              | 0.57-1.51     | 0.765                 |                           |
| Fruits                 |                   |               |                       | 0.773                     |
| T2 vs T1               | 0.92              | 0.59-1.44     | 0.716                 |                           |
| T3 vs T1               | 0.94              | 0.58-1.53     | 0.811                 |                           |
| Nuts                   |                   |               |                       | 0.927                     |
| T2 vs T1               | 1.12              | 0.71-1.78     | 0.619                 |                           |
| T3 vs T1               | 1.00              | 0.65-1.56     | 0.986                 |                           |
| Red meat               |                   |               |                       | 0.013                     |
| T2 vs T1               | 1.19              | 0.78-1.84     | 0.419                 |                           |
| T3 vs T1               | 1.89              | 1.14-3.15     | 0.014                 |                           |
| Processed meat         |                   |               |                       | 0.591                     |
| T2 vs T1               | 0.91              | 0.57-1.44     | 0.689                 |                           |
| T3 vs T1               | 1.30              | 0.73-2.31     | 0.367                 |                           |
| Poultry                |                   |               |                       | 0.342                     |
| T2 vs T1               | 1.10              | 0.70-1.75     | 0.678                 |                           |
| T3 vs T1               | 1.27              | 0.76-2.11     | 0.366                 |                           |
| Fish                   |                   |               |                       | 0.297                     |
| T2 vs T1               | 1.53              | 0.98-2.39     | 0.063                 |                           |
| T3 vs T1               | 1.35              | 0.86-2.13     | 0.195                 |                           |

|          |      |           |       |       |
|----------|------|-----------|-------|-------|
| Dairy    |      |           |       | 0.555 |
| T2 vs T1 | 1.26 | 0.83-1.90 | 0.281 |       |
| T3 vs T1 | 1.31 | 0.77-2.22 | 0.323 |       |
| Eggs     |      |           |       | 0.025 |
| T2 vs T1 | 1.11 | 0.71-1.74 | 0.651 |       |
| T3 vs T1 | 1.74 | 1.06-2.83 | 0.028 |       |

Odds ratios were derived from logistic regression models for tertiles 2 (T2) and tertiles 3 (T3) of included dietary factors using tertiles 1 (T1) as the reference group. Co-variables included age, sex, current smoking status, physical activity, total energy intake, BMI, common chronic diseases, brushing and oral conditions. *PDI* plant-based diet index, *hPDI* healthful plant-based diet index, *uPDI* unhealthful plant-based diet index.

**Table S7.** Associations of genera with ROU after further adjusting for brushing and oral conditions.

| Genera                      | Coefficient | p-Value | p-FDR |
|-----------------------------|-------------|---------|-------|
| <i>Atopobium</i>            | 0.049       | 0.016   | 0.115 |
| <i>TM7x</i>                 | 0.038       | 0.005   | 0.050 |
| <i>Roseburia</i>            | -0.007      | 0.022   | 0.143 |
| unclassified Muribaculaceae | -0.010      | 0.001   | 0.012 |
| Rikenellaceae RC9 gut group | -0.011      | 0.002   | 0.018 |
| <i>Gracilibacteria</i>      | -0.013      | 0.003   | 0.029 |
| <i>Abiotrophia</i>          | -0.026      | 0.023   | 0.147 |
| <i>Bergeyella</i>           | -0.038      | 0.014   | 0.105 |

Coefficient is the effect value obtained from MaAsLin2. *MaAsLin* Multivariate Analysis by Linear Models. ROU recurrent oral ulcer. ·  $p < 0.10$ , \*  $p < 0.05$ , \*\*  $p < 0.01$ , \*\*\*  $p < 0.001$ .

**Table S8.** Associations of genera with ROU using MaAsLin2 and ANCOM-BC.

| Genus                       | MaAsLin2    |         |       | ANCOM-BC    |         |
|-----------------------------|-------------|---------|-------|-------------|---------|
|                             | Coefficient | p-Value | p-FDR | Coefficient | p-Value |
| <i>Leptotrichia</i>         | 0.083       | 0.057   | 0.183 | 0.129       | 0.021   |
| <i>Actinomyces</i>          | 0.060       | 0.056   | 0.182 | 0.110       | 0.023   |
| <i>Atopobium</i>            | 0.049       | 0.016   | 0.085 | 0.182       | 0.001   |
| <i>TM7x</i>                 | 0.038       | 0.005   | 0.032 | 0.166       | 0.009   |
| <i>Corynebacterium</i>      | 0.034       | 0.044   | 0.159 | 0.121       | 0.018   |
| <i>Wolinella</i>            | -0.005      | 0.047   | 0.161 | 0.027       | 0.798   |
| Family XIII UCG-001         | -0.005      | 0.047   | 0.161 | 0.152       | 0.028   |
| <i>Roseburia</i>            | -0.007      | 0.022   | 0.102 | -0.167      | 0.129   |
| Unclassified Muribaculaceae | -0.010      | 0.001   | 0.008 | -0.483      | 0.001   |
| <i>Olsenella</i>            | -0.011      | 0.041   | 0.154 | -0.080      | 0.465   |
| Rikenellaceae RC9 gut group | -0.011      | 0.002   | 0.013 | -0.015      | 0.877   |
| <i>Peptococcus</i>          | -0.012      | 0.048   | 0.161 | -0.029      | 0.450   |
| <i>Streptobacillus</i>      | -0.013      | 0.038   | 0.147 | -0.290      | 0.026   |
| <i>Gracilibacteria</i>      | -0.014      | 0.002   | 0.017 | -0.194      | 0.131   |
| <i>Abiotrophia</i>          | -0.026      | 0.022   | 0.104 | -0.173      | 0.026   |

|                   |        |       |       |        |       |
|-------------------|--------|-------|-------|--------|-------|
| <i>Bergeyella</i> | -0.039 | 0.012 | 0.067 | -0.078 | 0.172 |
|-------------------|--------|-------|-------|--------|-------|

Associations of genera with ROU were analyzed by MaAsLin2 and ANCOM-BC. Coefficients were obtained from MaAsLin2 and ANCOM-BC. *ROU*, recurrent oral ulcer. *MaAsLin* Microbiome Multivariable Associations with Linear Models. *ANCOM-BC* Analysis of Compositions of Microbiomes with Bias Correction.

**Table S9.** Associations of genera with ROU in different sexes.

| Genus                       | Male        |                 | Female      |                 | <i>p</i> -interaction |
|-----------------------------|-------------|-----------------|-------------|-----------------|-----------------------|
|                             | Coefficient | <i>p</i> -Value | Coefficient | <i>p</i> -Value |                       |
| <i>Leptotrichia</i>         | 0.115       | 0.135           | 0.060       | 0.258           | 0.353                 |
| <i>Actinomyces</i>          | 0.135       | 0.031*          | 0.015       | 0.662           | 0.104                 |
| <i>Atopobium</i>            | 0.098       | 0.022*          | 0.025       | 0.257           | 0.245                 |
| <i>TM7x</i>                 | 0.029       | 0.274           | 0.045       | 0.005**         | 0.136                 |
| <i>Corynebacterium</i>      | 0.079       | 0.003**         | 0.014       | 0.514           | 0.075                 |
| <i>Wolinella</i>            | 0.001       | 0.883           | -0.008      | 0.002**         | 0.452                 |
| <i>Family_XIII_UCG.001</i>  | -0.002      | 0.633           | -0.006      | 0.030*          | 0.867                 |
| <i>Roseburia</i>            | -0.009      | 0.229           | -0.007      | 0.016*          | 0.787                 |
| unclassified Muribaculaceae | -0.004      | 0.499           | -0.013      | 0.000***        | 0.072                 |
| <i>Olsenella</i>            | -0.020      | 0.091           | -0.006      | 0.245           | 0.872                 |
| Rikenellaceae RC9 gut group | -0.011      | 0.090           | -0.011      | 0.005**         | 0.458                 |
| <i>Peptococcus</i>          | -0.019      | 0.045*          | -0.008      | 0.267           | 0.961                 |
| <i>Streptobacillus</i>      | -0.002      | 0.903           | -0.018      | 0.004**         | 0.999                 |
| <i>Gracilibacteria</i>      | -0.004      | 0.507           | -0.018      | 0.002**         | 0.431                 |
| <i>Abiotrophia</i>          | -0.020      | 0.261           | -0.029      | 0.041*          | 0.783                 |
| <i>Bergeyella</i>           | -0.004      | 0.790           | -0.053      | 0.014*          | 0.089                 |

Associations of genera with ROU in different sexes were analyzed by MaAsLin2. Coefficients were the effect values obtained from MaAsLin2. *p*-interaction of sex is obtained from the linear model. *MaAsLin* Multivariate Analysis by Linear Models. *ROU* recurrent oral ulcer. ·  $p < 0.10$ , \*  $p < 0.05$ , \*\*  $p < 0.01$ , \*\*\*  $p < 0.001$ .



**Table S10** MetaCyc pathways significantly associated with ROU as identified by MaAsLin2.

| Pathway        | Description                                                               | Ontology-pathway type                          | Coefficient | <i>p</i> -Value | <i>p</i> -FDR |
|----------------|---------------------------------------------------------------------------|------------------------------------------------|-------------|-----------------|---------------|
| PWY0-1297      | superpathway of purine deoxyribonucleosides degradation                   | Nucleoside and Nucleotide Degradation          | 0.009       | 0.022           | 0.065         |
| P161-PWY       | acetylene degradation (anaerobic)                                         | Generation of Precursor Metabolites and Energy | 0.008       | 0.029           | 0.078         |
| LACTOSECAT-PWY | lactose degradation I                                                     | Carbohydrate Degradation                       | 0.008       | 0.042           | 0.102         |
| PWY-5505       | L-glutamate and L-glutamine biosynthesis                                  | Amino Acid Biosynthesis                        | 0.008       | 0.018           | 0.056         |
| PWY-621        | sucrose degradation III (sucrose invertase)                               | Carbohydrate Degradation                       | 0.007       | 0.064           | 0.139         |
| PWY0-1298      | superpathway of pyrimidine deoxyribonucleosides degradation               | Nucleoside and Nucleotide Degradation          | 0.007       | 0.071           | 0.15          |
| PWY-5910       | superpathway of geranylgeranyldiphosphate biosynthesis I (via mevalonate) | Secondary Metabolite Biosynthesis              | 0.007       | 0.063           | 0.137         |
| PWY-7392       | taxadiene biosynthesis (engineered)                                       | Secondary Metabolite Biosynthesis              | 0.007       | 0.081           | 0.166         |
| PWY-6470       | peptidoglycan biosynthesis V ( $\beta$ -lactam resistance)                | Antibiotic Resistance                          | 0.006       | 0.055           | 0.124         |
| P124-PWY       | Bifidobacterium shunt                                                     | Generation of Precursor Metabolites and Energy | 0.005       | 0.014           | 0.048         |
| P122-PWY       | heterolactic fermentation                                                 | Generation of Precursor Metabolites and Energy | 0.005       | 0.006           | 0.024         |
| P441-PWY       | superpathway of N-acetylneuraminate degradation                           | Carboxylic Acid Degradation                    | 0.005       | 0.026           | 0.074         |
| PWY-7003       | glycerol degradation to butanol                                           | Generation of Precursor Metabolites and Energy | 0.004       | 0.046           | 0.108         |
| PWY-6353       | purine nucleotides degradation II (aerobic)                               | Nucleoside and Nucleotide Degradation          | 0.004       | 0.058           | 0.13          |
| PWY-4984       | urea cycle                                                                | Inorganic Nutrient Metabolism                  | 0.004       | 0.049           | 0.114         |
| P4-PWY         | superpathway of L-lysine, L-threonine and L-methionine biosynthesis I     | Amino Acid Biosynthesis                        | 0.004       | 0.01            | 0.038         |

|                  |                                                                        |                                                |        |       |       |
|------------------|------------------------------------------------------------------------|------------------------------------------------|--------|-------|-------|
| P164-PWY         | purine nucleobases degradation I (anaerobic)                           | Generation of Precursor Metabolites and Energy | 0.004  | 0.007 | 0.029 |
| SALVADEHYPOX-PWY | adenosine nucleotides degradation II                                   | Nucleoside and Nucleotide Degradation          | 0.003  | 0.036 | 0.091 |
| UDPNAGSYN-PWY    | UDP-N-acetyl-D-glucosamine biosynthesis I                              | Carbohydrate Biosynthesis                      | 0.003  | 0.055 | 0.124 |
| PWY-6478         | GDP-D-glycero- $\alpha$ -D-manno-heptose biosynthesis                  | Carbohydrate Biosynthesis                      | 0.003  | 0.046 | 0.108 |
| PWY-7187         | pyrimidine deoxyribonucleotides de novo biosynthesis II                | Nucleoside and Nucleotide Biosynthesis         | 0.003  | 0.021 | 0.062 |
| PWY-6608         | guanosine nucleotides degradation III                                  | Nucleoside and Nucleotide Degradation          | 0.003  | 0.062 | 0.136 |
| GLUCUROCAT-PWY   | superpathway of $\beta$ -D-glucuronosides degradation                  | Carbohydrate Degradation                       | 0.003  | 0.06  | 0.134 |
| PWY-5265         | peptidoglycan biosynthesis II (staphylococci)                          | Cell Structure Biosynthesis                    | 0.003  | 0.017 | 0.054 |
| PWY0-781         | aspartate superpathway                                                 | Superpathways                                  | 0.002  | 0.076 | 0.158 |
| P562-PWY         | myo-inositol degradation I                                             | Cyclitol Degradation                           | 0.002  | 0.063 | 0.138 |
| PWY-5973         | cis-vaccenate biosynthesis                                             | Fatty Acid and Lipid Biosynthesis              | -0.003 | 0.087 | 0.177 |
| RIBOSYN2-PWY     | flavin biosynthesis I (bacteria and plants)                            | Cofactor, Carrier, and Vitamin Biosynthesis    | -0.003 | 0.099 | 0.195 |
| PWY-7539         | 6-hydroxymethyl-dihydropterin diphosphate biosynthesis III (Chlamydia) | Other Biosynthesis                             | -0.005 | 0.005 | 0.022 |
| PANTO-PWY        | phosphopantothenate biosynthesis I                                     | Cofactor, Carrier, and Vitamin Biosynthesis    | -0.005 | 0.07  | 0.149 |
| PWY0-1319        | CDP-diacylglycerol biosynthesis II                                     | Fatty Acid and Lipid Biosynthesis              | -0.005 | 0.032 | 0.083 |
| ASPASN-PWY       | superpathway of L-aspartate and L-asparagine biosynthesis              | Amino Acid Biosynthesis                        | -0.005 | 0.042 | 0.102 |
| PWY-7560         | methylerythritol phosphate pathway II                                  | Secondary Metabolite Biosynthesis              | -0.005 | 0.025 | 0.072 |
| PWY-6467         | Kdo transfer to lipid IVA (Chlamydia)                                  | Cell Structure Biosynthesis                    | -0.005 | 0.046 | 0.108 |

|                 |                                                     |                                             |        |       |       |
|-----------------|-----------------------------------------------------|---------------------------------------------|--------|-------|-------|
| PWY-6897        | thiamine diphosphate salvage II                     | Cofactor, Carrier, and Vitamin Biosynthesis | -0.005 | 0.034 | 0.087 |
| THISYN-PWY      | superpathway of thiamine diphosphate biosynthesis I | Cofactor, Carrier, and Vitamin Biosynthesis | -0.006 | 0.026 | 0.074 |
| PWY-6703        | preQ0 biosynthesis                                  | Secondary Metabolite Biosynthesis           | -0.006 | 0.085 | 0.174 |
| PWY-6700        | queuosine biosynthesis I (de novo)                  | Nucleic Acid Processing                     | -0.006 | 0.018 | 0.056 |
| FASYN-ELONG-PWY | fatty acid elongation -- saturated                  | Fatty Acid and Lipid Biosynthesis           | -0.006 | 0.004 | 0.018 |
| PYRIDNUCSYN-PWY | NAD de novo biosynthesis I                          | Cofactor, Carrier, and Vitamin Biosynthesis | -0.006 | 0.033 | 0.085 |
| PWY-1269        | CMP-3-deoxy-D-manno-octulosonate biosynthesis       | Carbohydrate Biosynthesis                   | -0.007 | 0.021 | 0.063 |
| NAGLIPASYN-PWY  | lipid IVA biosynthesis (E. coli)                    | Cell Structure Biosynthesis                 | -0.008 | 0.017 | 0.053 |
| PYRIDOXSYN-PWY  | pyridoxal 5'-phosphate biosynthesis I               | Cofactor, Carrier, and Vitamin Biosynthesis | -0.008 | 0.064 | 0.139 |
| PWY-6519        | 8-amino-7-oxononanoate biosynthesis I               | Other Biosynthesis                          | -0.01  | 0.062 | 0.137 |
| PPGPPMET-PWY    | ppGpp metabolism                                    | Metabolic Regulator Biosynthesis            | -0.011 | 0.094 | 0.186 |

*ROU*, recurrent oral ulcer; *MaAsLin*, multivariate analysis by linear models. *FDR*, false discovery rate. Only results with  $FDR\ q < 0.20$  were displayed in this table.

**Table S11.** Associations of ROU-associated genera with hPDI in different sexes.

| Genus                       | <i>p</i> -Value |          | <i>p</i> -interaction |
|-----------------------------|-----------------|----------|-----------------------|
|                             | Male            | Female   |                       |
| <i>Leptotrichia</i>         | 0.362           | 0.247    | 0.209                 |
| <i>Actinomyces</i>          | 0.877           | 0.645    | 0.880                 |
| <i>Atopobium</i>            | 0.570           | 0.024*   | 0.556                 |
| TM7x                        | 0.783           | 0.002**  | 0.126                 |
| <i>Corynebacterium</i>      | 0.654           | 0.010*   | 0.211                 |
| <i>Wolinella</i>            | 0.747           | 0.721    | 0.708                 |
| Family XIII UCG-001         | 0.081·          | 0.005**  | 0.579                 |
| <i>Roseburia</i>            | 0.001**         | 0.247    | 0.057·                |
| unclassified Muribaculaceae | 0.015*          | 0.001**  | 0.585                 |
| <i>Olsenella</i>            | 0.039*          | 0.000*** | 0.808                 |
| Rikenellaceae RC9 gut group | 0.228           | 0.030*   | 0.008**               |
| <i>Peptococcus</i>          | 0.134           | 0.477    | 0.385                 |
| <i>Streptobacillus</i>      | 0.389           | 0.072·   | 0.074·                |
| <i>Gracilibacteria</i>      | 0.952           | 0.643    | 0.650                 |
| <i>Abiotrophia</i>          | 0.747           | 0.001**  | 0.082·                |
| <i>Bergeyella</i>           | 0.056·          | 0.013*   | 0.839                 |

Associations of the ROU-associated genera with hPDI in different sexes were analyzed by Wilcoxon rank sum test. *p*-interaction of sex is obtained from the linear model. *ROU* recurrent oral ulcer. *hPDI* healthful plant-based diet index. ·  $p < 0.10$ , \*  $p < 0.05$ , \*\*  $p < 0.01$ , \*\*\*  $p < 0.001$ .

**Table S12.** Associations of ROU-associated genera with red meat intakes in different sexes.

| Genus                       | <i>p</i> -Value |         | <i>p</i> -interaction |
|-----------------------------|-----------------|---------|-----------------------|
|                             | Male            | Female  |                       |
| <i>Leptotrichia</i>         | 0.769           | 0.603   | 0.699                 |
| <i>Actinomyces</i>          | 0.564           | 0.520   | 0.381                 |
| <i>Atopobium</i>            | 0.852           | 0.882   | 0.967                 |
| TM7x                        | 0.463           | 0.235   | 0.162                 |
| <i>Corynebacterium</i>      | 0.513           | 0.582   | 0.529                 |
| <i>Wolinella</i>            | 0.089·          | 0.174   | 0.724                 |
| Family_XIII_UCG.001         | 0.984           | 0.368   | 0.620                 |
| <i>Roseburia</i>            | 0.157           | 0.122   | 0.264                 |
| unclassified Muribaculaceae | 0.023*          | 0.527   | 0.182                 |
| <i>Olsenella</i>            | 0.000***        | 0.064·  | 0.120                 |
| Rikenellaceae RC9 gut group | 0.870           | 0.396   | 0.820                 |
| <i>Peptococcus</i>          | 0.046*          | 0.573   | 0.086·                |
| <i>Streptobacillus</i>      | 0.317           | 0.001** | 0.299                 |
| <i>Gracilibacteria</i>      | 0.609           | 0.455   | 0.754                 |
| <i>Abiotrophia</i>          | 0.255           | 0.108   | 0.346                 |
| <i>Bergeyella</i>           | 0.010*          | 0.888   | 0.016*                |

Associations of the ROU-associated genera with red meat intakes in different sexes were analyzed by Wilcoxon rank sum test. *p*-interaction of sex is obtained from the linear model. ·  $p < 0.10$ , \*  $p < 0.05$ , \*\*  $p < 0.01$ , \*\*\*  $p < 0.001$ .

**Table S13.** Associations of ROU-associated genera with egg intakes in different sexes.

| Genus                       | <i>p</i> -Value |        | <i>p</i> -interaction |
|-----------------------------|-----------------|--------|-----------------------|
|                             | Male            | Female |                       |
| <i>Leptotrichia</i>         | 0.471           | 0.136  | 0.838                 |
| <i>Actinomyces</i>          | 0.008**         | 0.322  | 0.002**               |
| <i>Atopobium</i>            | 0.011*          | 0.286  | 0.017*                |
| TM7x                        | 0.072           | 0.806  | 0.845                 |
| <i>Corynebacterium</i>      | 0.318           | 0.866  | 0.343                 |
| <i>Wolinella</i>            | 0.702           | 0.990  | 0.490                 |
| <i>Family_XIII_UCG.001</i>  | 0.402           | 0.458  | 0.812                 |
| <i>Roseburia</i>            | 0.282           | 0.119  | 0.513                 |
| unclassified Muribaculaceae | 0.277           | 0.239  | 0.687                 |
| <i>Olsenella</i>            | 0.136           | 0.436  | 0.532                 |
| Rikenellaceae RC9 gut group | 0.231           | 0.010* | 0.395                 |
| <i>Peptococcus</i>          | 0.863           | 0.927  | 0.237                 |
| <i>Streptobacillus</i>      | 0.373           | 0.573  | 0.034*                |
| <i>Gracilibacteria</i>      | 0.811           | 0.205  | 0.243                 |
| <i>Abiotrophia</i>          | 0.579           | 0.163  | 0.711                 |
| <i>Bergeyella</i>           | 0.676           | 0.445  | 0.141                 |

Associations of the ROU-associated genera with egg intakes in different sexes were analyzed by Wilcoxon rank sum test. *p*-interaction of sex is obtained from the linear model. \*  $p < 0.05$ , \*\*  $p < 0.01$ .
